# Supplementary material for: Diversification rates, host plant shifts and an updated molecular phylogeny of Andean Eois moths (Lepidoptera: Geometridae)
Source: PubMed Central journal article supplement (PMC5744940; doi:10.1371/journal.pone.0188430), 2017-12-27

# Host plant

- |                       |                            |
|-----------------------|----------------------------|
| ■ Berberidaceae       | ■ Onagraceae–Balsaminaceae |
| ■ Betulaceae          | ■ Orobanchaceae            |
| ■ Betulaceae–Fagaceae | ■ <i>Peperomia</i>         |
| ■ Campanulaceae       | ■ <i>Piper</i>             |
| ■ Caryophyllaceae     | ■ Plantaginaceae           |
| ■ Clethraceae         | ■ Polygonaceae             |
| ■ Fabaceae            | ■ Ranunculaceae            |
| ■ Fagaceae            | ■ Rhamnaceae               |
| ■ <i>Hedyosmum</i>    | ■ Rosaceae                 |
| ■ Herb–polyphagous    | ■ Rosaceae–Vitaceae        |
| ■ Hypericaceae        | ■ Rubiaceae                |
| ■ Lamiaceae           | ■ Sapindaceae              |
| ■ Malvaceae           | ■ <i>Siparuna</i>          |
| ■ <i>Manekia</i>      | ■ Woody–polyphagous        |
| ■ Myrsinaceae         |                            |

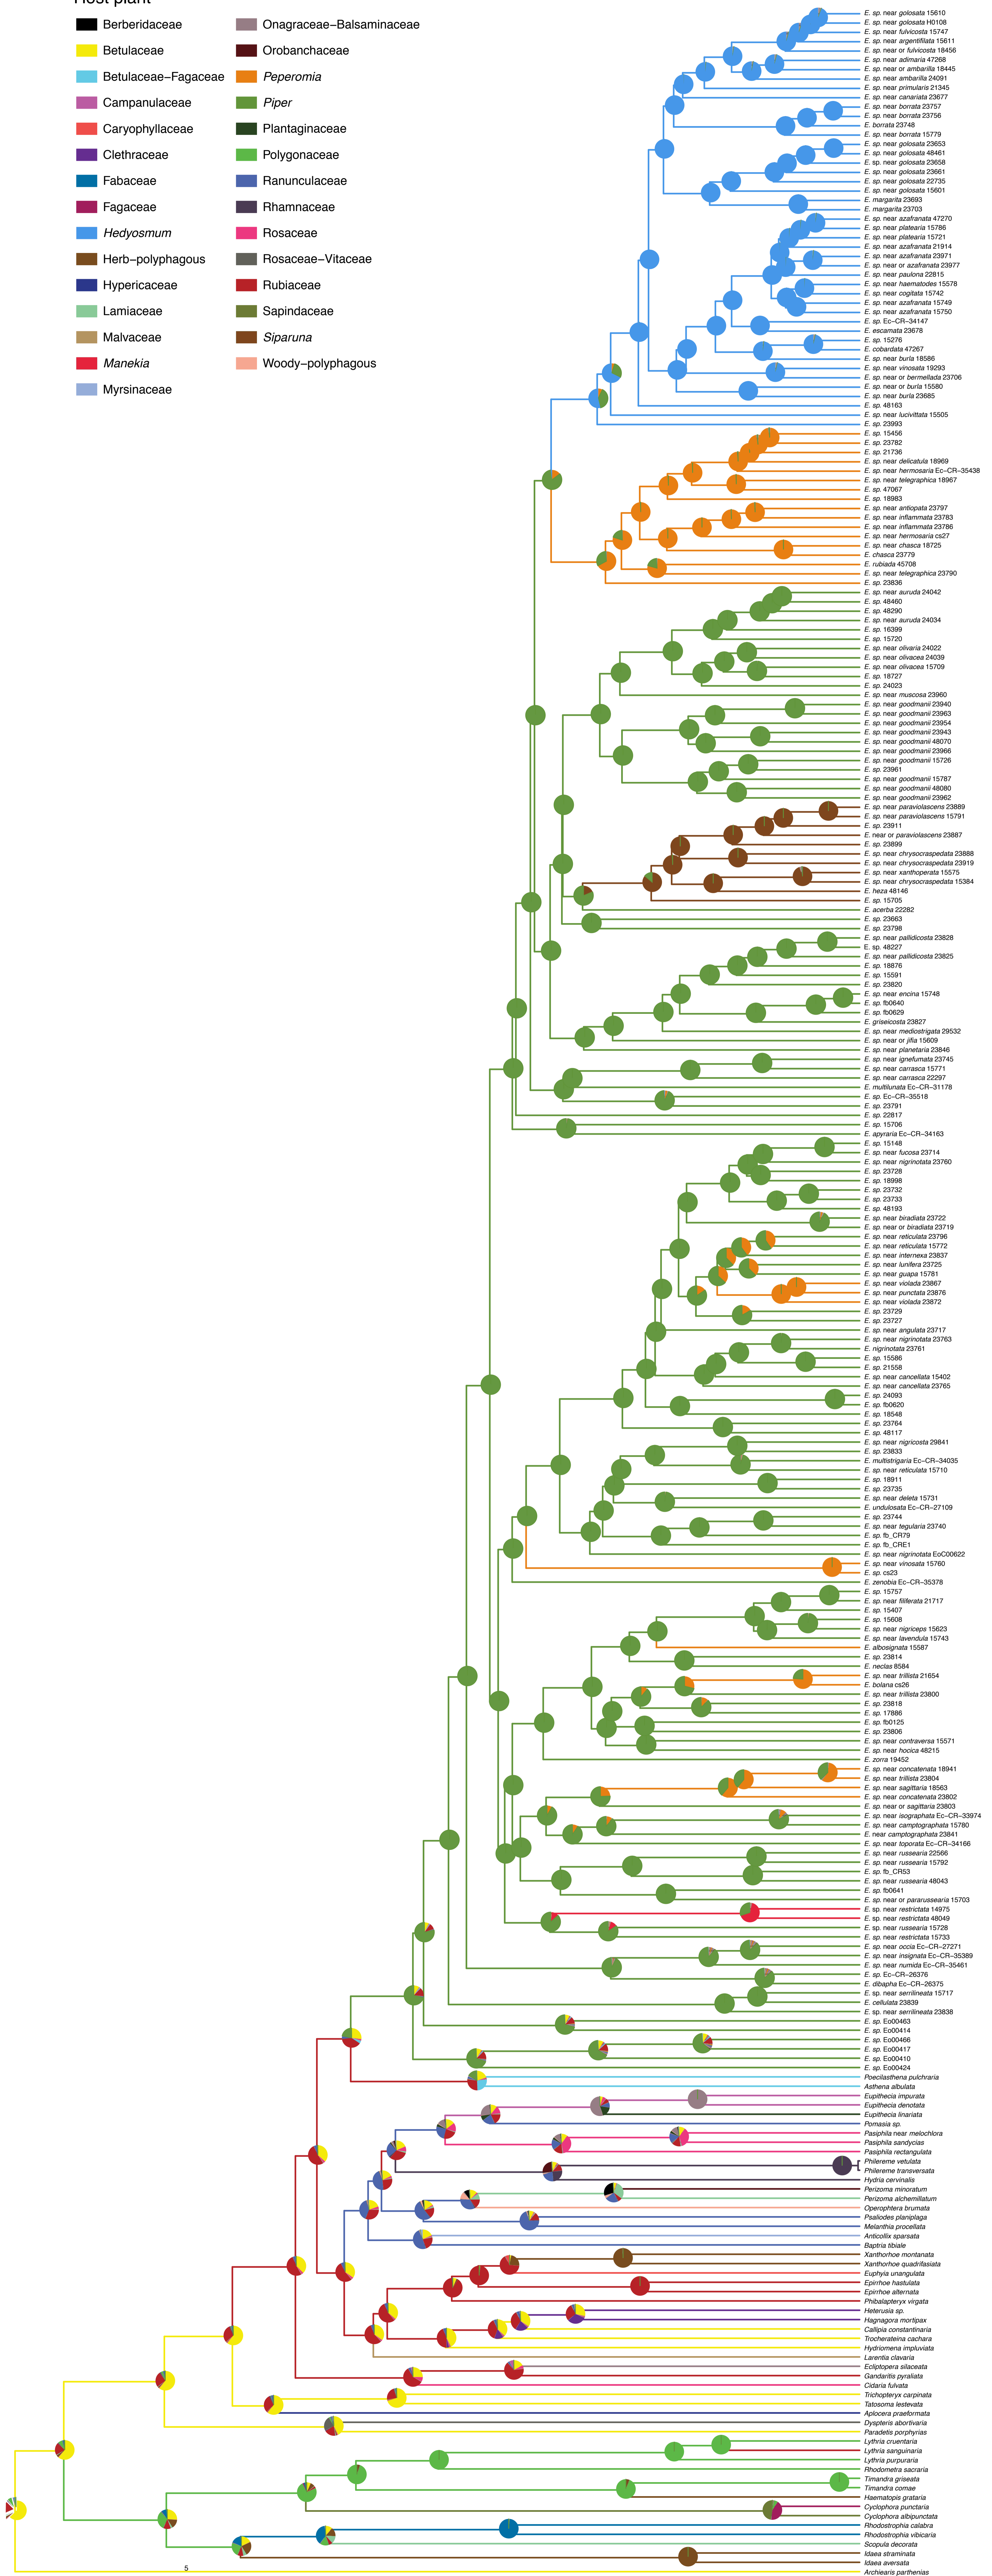

Supplement: pone.0188430.s003.pdf [file pone.0188430.s003.pdf]
