# Supplementary material for: Diversification rates, host plant shifts and an updated molecular phylogeny of Andean Eois moths (Lepidoptera: Geometridae)
Source: PubMed Central journal article supplement (PMC5744940; doi:10.1371/journal.pone.0188430), 2017-12-27
Supplement: pone.0188430.s004.pdf [file pone.0188430.s004.pdf]

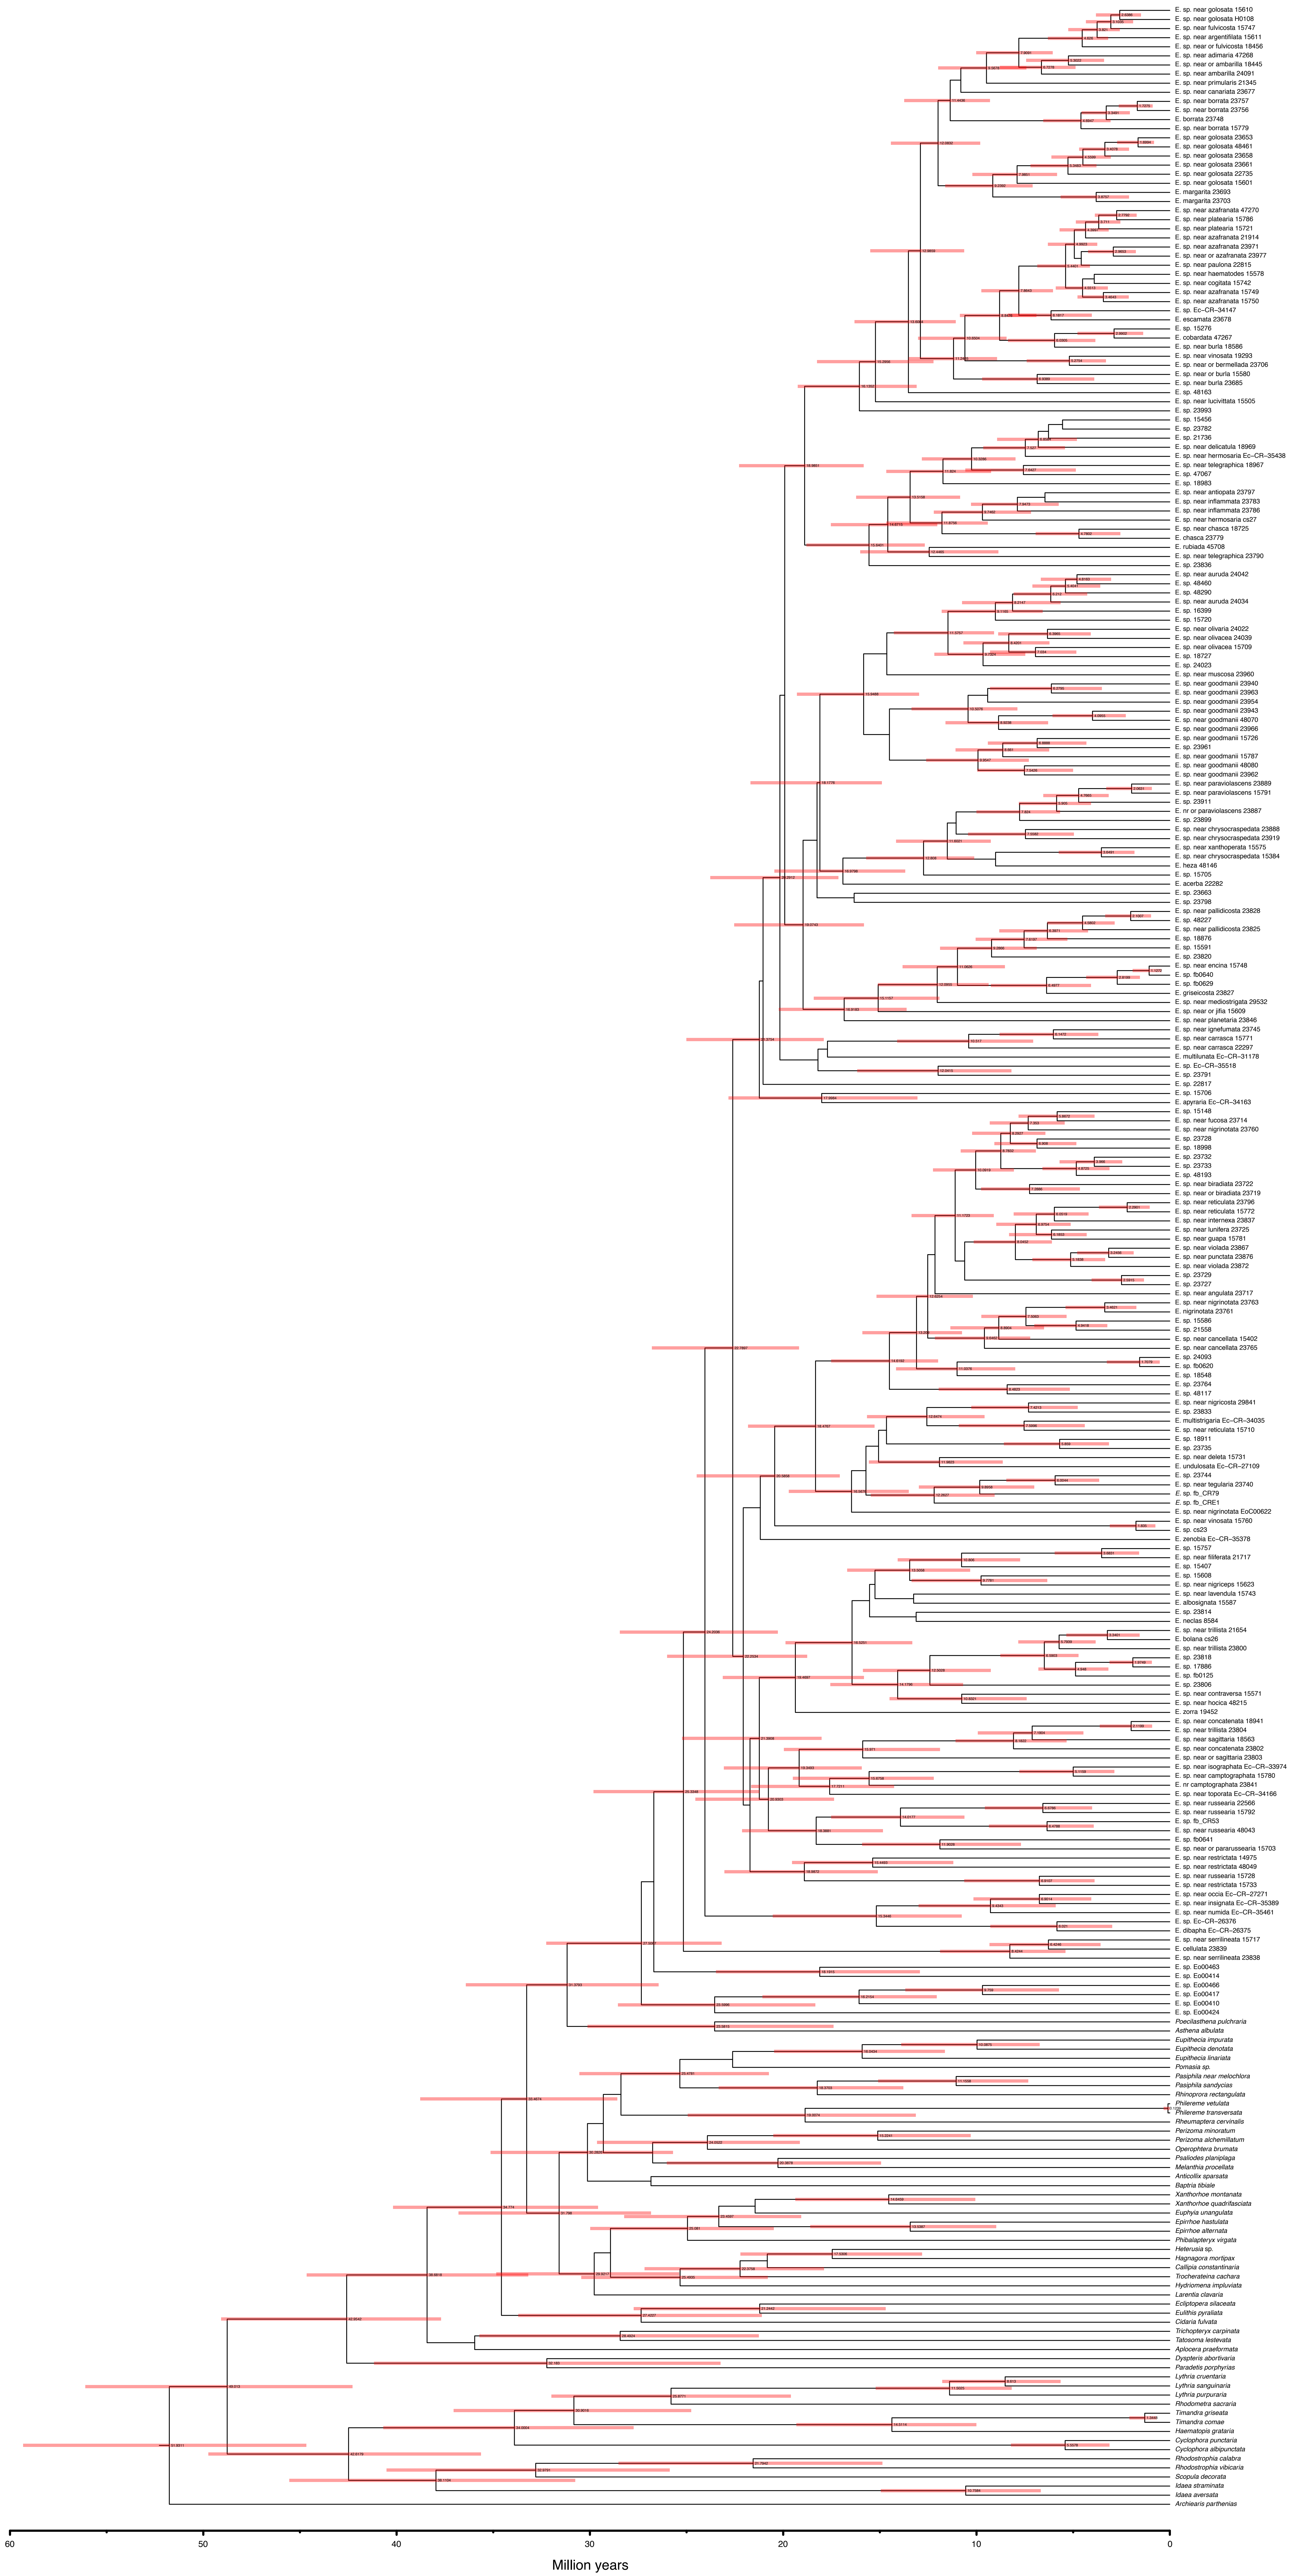

60 50 40 30 20 10 0  
Million years
